# Supplementary material for: Risk of heart failure after community acquired pneumonia: prospective controlled study with 10 years of follow-up
Source: PubMed Central journal article supplement — BMJ. 2017 Feb 13;356:j413. doi: 10.1136/bmj.j413 (PMC5421448; doi:10.1136/bmj.j413), 2017-02-13
Supplement: eurd035000.wt1.pdf [file eurd035000.wt1.pdf]

**Supplemental Table 1 – Risk of Heart Failure Among Cases and Controls Stratified by Age**

| N=28 048                      | Control        | Case          | Adjusted Hazard Ratio with 95% Confidence interval | p-value |
|-------------------------------|----------------|---------------|----------------------------------------------------|---------|
| <b>≤ 65 years (n, %)</b>      | <b>n=15838</b> | <b>n=3226</b> |                                                    |         |
| Incident HF Overall Follow-up |                |               |                                                    |         |
| Combined                      | 347 (2.2)      | 155 (4.8)     | 1.98 (1.55 to 2.53)                                | <0.001  |
| Inpatients                    | 126 (3.1)      | 75 (8.9)      | 3.6 (2.29 to 5.7)                                  | <0.001  |
| Outpatients                   | 221 (1.9)      | 80 (3.4)      | 1.46 (1.05 to 2.0)                                 | 0.02    |
| Incident HF within 90 days    |                |               |                                                    |         |
| Combined                      | 25 (0.2)       | 10 (0.3)      | 1.91 (0.53 to 6.8)                                 | 0.32    |
| Incident HF within 1 year     |                |               |                                                    |         |
| Combined                      | 57 (0.4)       | 33 (1.0)      | 2.68 (1.50 to 4.78)                                | <0.001  |
| <b>&gt;65 years (n, %)</b>    | <b>n=7222</b>  | <b>n=1762</b> |                                                    |         |
| Incident HF Overall Follow-up |                |               |                                                    |         |
| Combined                      | 1365 (18.9)    | 437 (24.8)    | 1.55 (1.36 to 1.77)                                | <0.001  |
| Inpatients                    | 749 (19.0)     | 259 (26.3)    | 1.77 (1.47 to 2.1)                                 | <0.001  |
| Outpatients                   | 616 (18.7)     | 178 (22.9)    | 1.31 (1.07 to 1.60)                                | 0.01    |
| Incident HF within 90 days    |                |               |                                                    |         |
| Combined                      | 120 (1.7)      | 58 (3.3)      | 1.56 (1.08 to 2.24)                                | 0.02    |
| Incident HF within 1 year     |                |               |                                                    |         |

|          |           |           |                     |        |
|----------|-----------|-----------|---------------------|--------|
| Combined | 264 (3.7) | 131 (7.4) | 1.80 (1.41 to 2.29) | <0.001 |
|----------|-----------|-----------|---------------------|--------|
